# Supplementary material for: A SiPM-Enabled Portable Delayed Fluorescence Photon Counting Device: Climatic Plant Stress Biosensing
Source: MDPI journal article supplement (doi:10.3390/bios12100817), 2022-10-02
Supplement: s1 [file s1]

## Supplementary Information:

# A SiPM-Enabled Portable Delayed Fluorescence Photon Counting Device: Climatic Plant Stress Biosensing

William J. Pietro <sup>1,†</sup> and Ozzy Mermut <sup>2,\*,†</sup>

<sup>1</sup> Department of Chemistry, York University, 4700 Keele St., Toronto, ON M3J 1P3, Canada

<sup>2</sup> Department of Physics and Astronomy, York University, 4700 Keele St., Toronto, ON M3J 1P3, Canada

\* Correspondence: omermut@yorku.ca

† These authors contributed equally to this work.

*Supplimentary Information for section 3.2.3. Measurement of Higher-Level Avalanches*

Single and higher-level avalanche voltage spikes were measured with a 2 gigasample per second digital oscilloscope (LeCroy WaveAce 234). Single avalanches produce amplified voltage spikes of nominally 50 mV (post-amplifier) driving a 50  $\Omega$  transmission line with 50  $\Omega$  termination. Double avalanches were measured to be 100 mV, 150 mV for triple, and 190 mV for quadruple.

At the input of the PCS121 is a high-speed PECL analog comparator with a software-selectable precision reference voltage. Reference voltages of 45 mV, 90 mV, 140 mV, and 185 mV, were used to count single, double, triple, and quadruple avalanche events, respectively. Hence, we can directly measure the numbers of higher-order spikes for comparison with equation 5. The specifications of the SiPM and associated circuitry used in equation 5 are presented in Table S1.

A Würth Elektronik model 150120BS75000 blue LED emitting at 465 nm was used as the light source. Luminous intensity was varied between 0 and 290 mcd by regulating the current through the LED to a maximum of 20 mA. The SiPM was covered with a cap containing a 0.5 mm diameter pinhole. The path length from the LED to the SiPM was 26 mm.

**Table S1.** Experimental parameters for SiPM/amplifier/counter system.

| Parameter                      | Symbol         | Value                |
|--------------------------------|----------------|----------------------|
| Active area                    | A              | 0.64 mm <sup>2</sup> |
| SPAD recovery time             | $\tau_r$       | 82 ns                |
| LED wavelength                 | $\lambda$      | 465 nm               |
| Photon detection efficiency    | $\gamma$       | 0.29 at 465 nm       |
| Measured circuit response time | $\tau$         | 22 ns                |
| SiPM operating voltage         | V              | 27.5 V               |
| Measured dark count rate       | C <sub>d</sub> | 55 kHz               |
| Bin width                      | t <sub>w</sub> | 1000 $\mu$ s         |

A count at level  $m$ ,  $x_m$ , for an SiPM contains all spikes at level  $m$  and higher. For example, when measuring current spikes at level 1, the count,  $x_1$ , contains all level 1 and higher spikes. Count  $x_2$  contains all level 2 and higher spikes, etc. Therefore, we generate a corrected set of experimental counts,  $d$ , such that  $d_i = x_i - x_{i+1}$ .

We measured up to level 4 current spikes, hence  $d_4 = x_4$ . The number of avalanches occurring in time window  $t_w$  is,

$$N_a(exp) = \sum_{m=1}^4 md_m = \sum_{m=1}^4 x_m \quad (S1)$$

The observed total number of spikes,  $C_{obs}$ , is simply  $x_1$ . Table S2 compares the avalanche count,  $N_a$ , by discrete measurement of  $x_i$  ( $i = 1-4$ ) with the avalanche count estimated by Equation 10 in the manuscript.

**Table S2.** Comparison of measured and calculated avalanche count in 1000  $\mu$ s time bin.

| LED current (mA) | $C_{obs}$ | $N_a$            |                         |
|------------------|-----------|------------------|-------------------------|
|                  |           | Measured (Eq. 6) | Calculated (Eq. 1 (SI)) |
| 0.25             | 111       | 111              | 111.0                   |
| 0.49             | 165       | 167              | 165.0                   |
| 0.88             | 256       | 261              | 257.0                   |
| 1.06             | 294       | 301              | 295.0                   |
| 1.25             | 337       | 345              | 338.0                   |
| 1.44             | 385       | 396              | 387.0                   |
| 1.87             | 473       | 487              | 475.0                   |
| 2.96             | 702       | 723              | 707.0                   |
| 3.29             | 765       | 789              | 772.0                   |
| 4.39             | 985       | 1017             | 996.0                   |
| 5.48             | 1190      | 1231             | 1206.0                  |
| 6.22             | 1326      | 1371             | 1346.0                  |
| 7.37             | 1535      | 1588             | 1561.0                  |
| 9.00             | 1820      | 1884             | 1857.0                  |
| 10.86            | 2125      | 2203             | 2176.0                  |
| 11.41            | 2210      | 2291             | 2266.0                  |
| 12.51            | 2383      | 2472             | 2448.0                  |
| 13.79            | 2575      | 2672             | 2651.0                  |
| 14.77            | 2715      | 2818             | 2799.0                  |
| 16.22            | 2915      | 3025             | 3013.0                  |
| 17.70            | 3126      | 3245             | 3239.0                  |
| 18.66            | 3244      | 3370             | 3366.0                  |
| 19.86            | 3395      | 3526             | 3528.0                  |
| 21.81            | 3627      | 3770             | 3780.0                  |
